# Supplementary material for: Protective effect of α-lipoic acid against radiation-induced fibrosis in mice
Source: PubMed Central journal article supplement (PMC4941260; doi:10.18632/oncotarget.6952), 2016-01-20
Supplement: oncotarget-07-15554-s001.pdf [file oncotarget-07-15554-s001.pdf]

## Protective effect of $\alpha$ -lipoic acid against radiation-induced fibrosis in mice

### Supplementary Materials

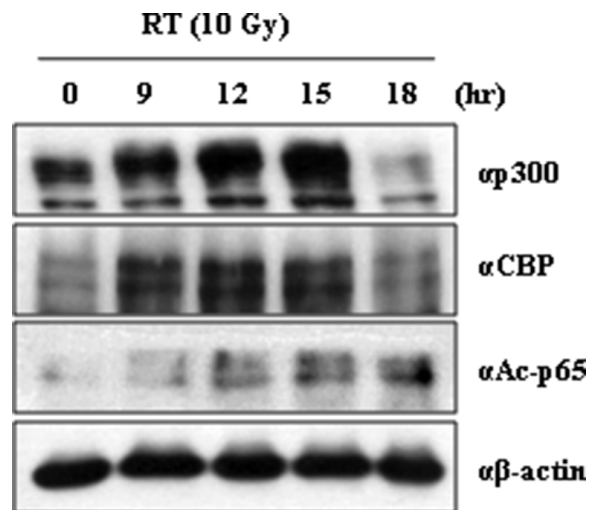

**Supplementary Figure S1: Radiation induces the hyperacetylation of p65.** The activated p300/CBP by radiation enhanced the p65 acetylation in radiation-induced fibrosis. Cells were exposed by radiation (10 Gy). Sample lysates were measured by immunoblotting using the indicated antibodies.

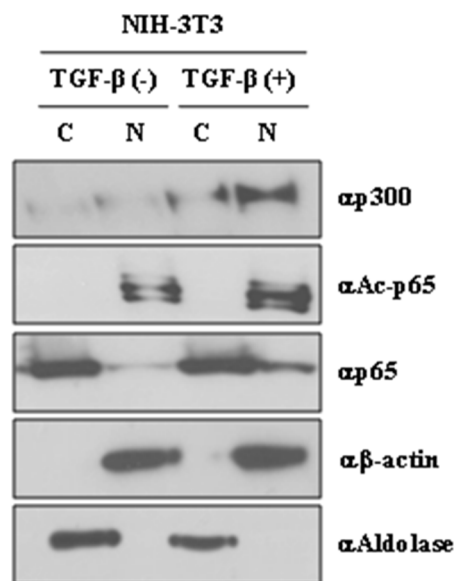

**Supplementary Figure S2: TGF- $\beta$ 1 induces the nuclear translocation of p300 and acetylated p65.** NIH-3T3 cells were treated by TGF- $\beta$ 1 for 12 h, and cells were extracted by the cytoplasm/nuclear fraction buffers, and the fractionated samples were measured by immunoblotting using the indicated antibodies.
